# Supplementary material for: Scabies prevalence after ivermectin-based mass drug administration for lymphatic filariasis, Samoa 2018–2019
Source: PubMed Central journal article supplement (PMC10497159; doi:10.1371/journal.pntd.0011549), 2023-08-22
Supplement: pntd.0011549.s001.pdf [file pntd.0011549.s001.pdf]

**S1 Table. Crude and adjusted prevalence of scabies by age group and International Alliance for the Control of Scabies (IACS) classifications (41), Samoa, Surveys 1 and 2.**

| Age group (years) | IACS classifications         | Survey 1 |                             |                                 | Survey 2 |                             |                                 |
|-------------------|------------------------------|----------|-----------------------------|---------------------------------|----------|-----------------------------|---------------------------------|
|                   |                              | n        | Crude prevalence % (95% CI) | Adjusted prevalence* % (95% CI) | n        | Crude prevalence % (95% CI) | Adjusted prevalence* % (95% CI) |
| <b>0-4</b>        | B3 – Clinical                | 22       | 4.6 (2.9-6.9)               | 3.5 (2.9-4.4)                   | 14       | 7.4 (4.1-12.2)              | 7.2 (6.2-8.4)                   |
|                   | C1 – Suspected               | 3        | 0.6 (0.1-1.8)               | 0.7 (0.5-1.1)                   | 2        | 1.1 (0.1-3.8)               | 1.0 (0.6-1.6)                   |
|                   | C2 – Suspected atypical      | 8        | 1.7 (0.7-3.3)               | 2.2 (1.6-3.1)                   | 5        | 2.6 (0.9-6.1)               | 2.8 (2.0-3.8)                   |
|                   | ‘Any scabies’ (B3, C1, & C2) | 33       | 6.9 (4.8-9.5)               | 6.5 (5.6-7.5)                   | 21       | 11.2 (7.0-16.6)             | 11.0 (9.3-13.0)                 |
| <b>5-15</b>       | B3 – Clinical                | 10       | 1.2 (0.6-2.2)               | 1.1 (0.9-1.5)                   | 13       | 1.3 (0.7-2.3)               | 1.5 (1.2-1.9)                   |
|                   | C1 – Suspected               | 3        | 0.4 (0.1-1.1)               | 0.2 (0.2-0.3)                   | 5        | 0.5 (0.2-1.2)               | 0.6 (0.4-0.9)                   |
|                   | C2 – Suspected atypical      | 10       | 1.2 (0.6-2.2)               | 1.6 (1.2-2.1)                   | 19       | 2.0 (1.2-3.0)               | 2.0 (1.7-2.4)                   |
|                   | ‘Any scabies’ (B3, C1, & C2) | 23       | 2.8 (1.8-4.2)               | 3.0 (2.4-3.6)                   | 37       | 3.8 (2.7-5.2)               | 4.2 (3.6-4.8)                   |
| <b>≥16</b>        | B3 – Clinical                | 10       | 0.6 (0.3-1.2)               | 0.7 (0.5-0.9)                   | 19       | 1.2 (0.7-1.8)               | 1.6 (1.3-2.1)                   |
|                   | C1 – Suspected               | 5        | 0.3 (0.1-0.7)               | 0.5 (0.3-0.7)                   | 8        | 0.5 (0.2-1.0)               | 0.3 (0.3-0.5)                   |
|                   | C2 – Suspected atypical      | 3        | 0.2 (0.0-0.6)               | 0.1 (0.1-0.2)                   | 18       | 1.1 (0.6-1.7)               | 1.0 (0.8-1.2)                   |
|                   | ‘Any scabies’ (B3, C1, & C2) | 18       | 1.1 (0.7-1.8)               | 1.2 (1.0-1.5)                   | 45       | 2.8 (2.0-3.7)               | 3.0 (2.5-3.4)                   |

\*Adjusted for survey design (clustering and household selection probability within PSU) and standardised for gender
