# Supplementary material for: Scabies prevalence after ivermectin-based mass drug administration for lymphatic filariasis, Samoa 2018–2019
Source: PubMed Central journal article supplement (PMC10497159; doi:10.1371/journal.pntd.0011549), 2023-08-22
Supplement: pntd.0011549.s002.pdf [file pntd.0011549.s002.pdf]

**S2 Table. Crude and adjusted prevalence of ‘any scabies’ by PSU, Samoa, Surveys 1 and 2**

| PSU | Survey 1 |                             |                                 | Survey 2 |                             |                                 |
|-----|----------|-----------------------------|---------------------------------|----------|-----------------------------|---------------------------------|
|     | n        | Crude prevalence % (95% CI) | Adjusted prevalence* % (95% CI) | n        | Crude prevalence % (95% CI) | Adjusted prevalence* % (95% CI) |
| 1   | 76       | 0.0 (0.0-4.7)               | 0 (-)                           | 66       | 7.6 (2.5-16.8)              | 6.6 (5.7-7.6)                   |
| 2   | 76       | 5.3 (1.5-12.9)              | 11.8 (10.9-12.7)                | 60       | 3.3 (0.4-11.5)              | 1.5 (1.2-1.9)                   |
| 3   | 76       | 0.0 (0.0-4.7)               | 0 (-)                           | 82       | 4.9 (1.3-12.0)              | 3.4 (2.5-4.5)                   |
| 4   | 84       | 3.6 (0.7-10.1)              | 3.6 (2.7-4.6)                   | 71       | 5.6 (1.6-13.8)              | 4.5 (3.5-5.8)                   |
| 5   | 100      | 6.0 (2.2-12.6)              | 7.1 (6.4-7.8)                   | 83       | 12.0 (5.9-21.0)             | 16.9 (15.5-18.4)                |
| 6   | 77       | 1.2 (0.0-7.0)               | 1.3 (0.9-1.9)                   | 75       | 5.3 (14.7-13.1)             | 5.0 (4.3-5.8)                   |
| 7   | 81       | 0.0 (0.0-4.4)               | 0 (-)                           | 90       | 2.2 (2.7-7.8)               | 2.3 (1.7-3.2)                   |
| 8   | 82       | 1.2 (0.0-6.6)               | 1.0 (0.7-1.3)                   | 91       | 3.3 (0.7-9.3)               | 3.0 (2.2-3.9)                   |
| 9   | 92       | 1.0 (0.0-5.9)               | 1.1 (0.7-1.6)                   | 70       | 11.4 (5.1-21.3)             | 11.1 (9.8-12.5)                 |
| 10  | 82       | 3.6 (0.8-10.3)              | 5.0 (3.9-6.4)                   | 73       | 1.4 (0.0-7.4)               | 1.0 (0.7-1.3)                   |
| 11  | 82       | 0.0 (0.0-0.4.3)             | 0.0 (-)                         | 74       | 0 (0.0-4.9)                 | 0.0 (-)                         |
| 12  | 78       | 6.4 (2.1-14.3)              | 5.8 (4.6-7.4)                   | 78       | 3.8 (0.8-10.8)              | 5.6 (4.8-6.5)                   |
| 13  | 96       | 0.0 (0.0 -3.8)              | 0.0 (-)                         | 77       | 7.8 (2.9-16.2)              | 8.9 (7.5-10.7)                  |
| 14  | 85       | 0.0 (0.0-4.2)               | 0.0 (-)                         | 86       | 0.0 (0.0-4.2)               | 0.0 (-)                         |
| 15  | 84       | 0.0 (0.0-4.3)               | 0.0 (-)                         | 69       | 1.4 (0.0-7.8)               | 1.3 (1.0-1.7)                   |
| 16  | 85       | 0.0 (0.0-4.2)               | 0.0 (-)                         | 69       | 2.9 (3.5-10.1)              | 2.3 (1.9-2.8)                   |
| 17  | 90       | 4.4 (1.2-11.0)              | 3.1 (2.4-3.9)                   | 75       | 0.0 (0.0-4.8)               | 0.0 (-)                         |
| 18  | 78       | 0.0 (0.0-1.4)               | 0.0 (-)                         | 78       | 5.1 (1.4-12.6)              | 2.5 (2.2-2.9)                   |
| 19  | 74       | 4.0 (0.8-11.4)              | 9.3 (8.7-9.9)                   | 107      | 7.5 (3.3-14.2)              | 7.7 (6.7-8.7)                   |
| 20  | 92       | 4.3 (1.2-10.8)              | 3.3 (2.6-4.2)                   | 76       | 5.3 (1.4-12.9)              | 5.4 (4.6-6.2)                   |
| 21  | 84       | 2.4 (0.3-8.3)               | 1.8 (1.4-2.4)                   | 68       | 1.5 (0.0-7.9)               | 0.6 (0.5-0.8)                   |
| 22  | 91       | 2.2 (0.3-7.7)               | 2.8 (2.4-3.2)                   | 69       | 5.8 (1.6-14.2)              | 5.8 (5.1-6.6)                   |
| 23  | 88       | 7.9 (3.2-15.7)              | 6.7 (5.5-8.0)                   | 97       | 4.1 (1.1-10.2)              | 4.5 (3.7-5.4)                   |
| 24  | 82       | 1.2 (0.0-6.6)               | 1.6 (1.1-2.4)                   | 72       | 1.4 (0.0-7.4)               | 0.9 (0.6-1.3)                   |
| 25  | 82       | 6.0 (2.0-13.6)              | 5.7 (4.7-6.7)                   | 93       | 1.1 (0.0-5.8)               | 7.8 (-)                         |
| 26  | 86       | 1.2 (0.0-6.3)               | 0.8 (0.5-1.1)                   | 75       | 4.0 (0.8-11.2)              | 1.8 (1.4-2.4)                   |
| 27  | 100      | 3.0 (0.6-8.5)               | 1.8 (1.4-2.5)                   | 79       | 3.8 (0.8-10.7)              | 17.1 (16.5-17.7)                |
| 28  | 52       | 9.6 (3.2-21.0)              | 12.2 (10.2-14.5)                | 85       | 0 (0.0-4.2)                 | 0.0 (-)                         |
| 29  | 91       | 2.1 (0.3-7.7)               | 1.2 (1.0-1.5)                   | 82       | 1.2 (0.0-6.6)               | 1.7 (1.3-2.3)                   |
| 30  | 72       | 0.0 (0.0-5.0)               | 0.0 (-)                         | 75       | 2.7 (0.3-9.3)               | 1.9 (1.4-2.5)                   |
| 31  | 65       | 6.1 (1.7-15.0)              | 5.4 (0.4-7.2)                   | 98       | 0.0 (0.0-3.7)               | 0.0 (-)                         |
| 32  | 80       | 2.5 (0.3-8.7)               | 2.9 (2.0-4.1)                   | 88       | 5.6 (1.9-12.8)              | 5.6 (4.7-6.6)                   |
| 33  | 87       | 3.4 (0.7-9.7)               | 2.9 (2.3-3.6)                   | 88       | 2.2 (0.3-8.0)               | 4.2 (3.9-4.4)                   |
| 34  | 64       | 3.1 (0.4-10.8)              | 2.4 (2.0-2.8)                   | 86       | 3.5 (0.7-9.9)               | 4.8 (3.9.0-5.7)                 |
| 35  | 74       | 0.0 (0.0-4.9)               | 0.0 (-)                         | 91       | 2.1 (0.3-7.7)               | 2.9 (2.1-4.0)                   |

\*Adjusted for survey design (clustering and household selection probability within PSU) and standardised for age and gender
