# Supplementary material for: Scabies prevalence after ivermectin-based mass drug administration for lymphatic filariasis, Samoa 2018–2019
Source: PubMed Central journal article supplement (PMC10497159; doi:10.1371/journal.pntd.0011549), 2023-08-22
Supplement: pntd.0011549.s003.pdf [file pntd.0011549.s003.pdf]

**S3 Table. Crude (univariate model) and adjusted (multivariable model) odds ratios for scabies prevalence (IACS B3, C1 and C2 classifications combined) in participants aged ≥5 years (eligible for ivermectin in 2018 MDA), Samoa, Surveys 1 and 2**

|                                                               | Sample size (N) | Scabies (n) | Prevalence* (95%CI) | Unadjusted Odds Ratio (95% CI) | Adjusted Odds Ratio (95% CI)^    | Multivariable model p value |
|---------------------------------------------------------------|-----------------|-------------|---------------------|--------------------------------|----------------------------------|-----------------------------|
| <b>Total participants</b>                                     | 4997            | 123         | 2.5 (2.3-2.8)       |                                |                                  |                             |
| <b>Survey</b>                                                 |                 |             |                     |                                |                                  |                             |
| Survey 1                                                      | 2389            | 41          | 1.7 (1.5-2.0)       | 1.0                            | 1.0                              | -                           |
| Survey 2                                                      | 2608            | 82          | 3.3 (2.9-3.8)       | 2.0 (1.7-2.3)                  | <b>2.2 (1.9-2.5)</b>             | <0.001                      |
| <b>Region</b>                                                 |                 |             |                     |                                |                                  |                             |
| Apia Urban Area                                               | 801             | 33          | 4.7 (4.0-5.5)       | 3.5 (2.5-4.8)                  | <b>3.4 (2.5-4.5)</b>             | <0.001                      |
| North West Upolu                                              | 2024            | 46          | 2.3 (1.9-2.7)       | 1.7 (1.3-2.3)                  | <b>1.6 (1.2-2.2)</b>             | 0.004                       |
| Rest of Upolu                                                 | 1195            | 26          | 2.4 (2.1-2.7)       | 1.8 (1.4-2.5)                  | <b>1.7 (1.2-2.3)</b>             | 0.001                       |
| Savai'i                                                       | 977             | 18          | 1.3 (1.0-1.6)       | 1.0                            | 1.0                              | -                           |
| <b>Number of residents in household</b>                       |                 |             |                     |                                |                                  |                             |
| 1-4                                                           | 807             | 13          | 1.2 (0.9-1.5)       | 1.0                            | 1.0                              | -                           |
| 5-8                                                           | 2064            | 44          | 2.1 (1.7-2.4)       | 2.0 (1.5-2.6)                  | <b>2.0 (1.5-2.6)</b>             | <0.001                      |
| 9-12                                                          | 1184            | 33          | 2.9 (2.5-3.4)       | 2.9 (2.2-3.9)                  | <b>2.9 (2.2-3.9)</b>             | <0.001                      |
| 13-20                                                         | 942             | 33          | 3.6 (3.1-4.3)       | 3.6 (2.7-4.9)                  | <b>3.6 (2.6-4.9)</b>             | <0.001                      |
| <b>Gender</b>                                                 |                 |             |                     |                                |                                  |                             |
| Male                                                          | 2279            | 51          | 2.2 (1.9-2.5)       | 1.0                            | 1.0                              | -                           |
| Female                                                        | 2718            | 72          | 2.8 (2.5-3.2)       | 1.2 (1.0-1.4)                  | <b>1.2 (1.0<sup>#</sup>-1.4)</b> | 0.023                       |
| <b>Age groups in years</b>                                    |                 |             |                     |                                |                                  |                             |
| 5-15                                                          | 1791            | 60          | 3.6 (3.2-4.1)       | 1.7 (1.5-1.9)                  | <b>1.6 (1.4-1.8)</b>             | <0.001                      |
| ≥16                                                           | 3206            | 63          | 2.1 (1.8-2.3)       | 1.0                            | 1.0                              | -                           |
| <b>At least one employed person screened in the household</b> |                 |             |                     |                                |                                  |                             |
| Yes                                                           | 2193            | 52          | 2.5 (2.1-3.0)       | 1.0                            | 1.0                              | -                           |
| No                                                            | 2804            | 71          | 2.6 (2.2-3.0)       | 1.0 (0.8-1.2)                  | <b>1.3 (1.0<sup>#</sup>-1.6)</b> | 0.023                       |
| <b>Took ivermectin-based mass drug administration in 2018</b> |                 |             |                     |                                |                                  |                             |
| Yes                                                           | 4420            | 107         | 2.3 (2.1-2.6)       | 1.0                            | 1.0                              | -                           |
| No                                                            | 577             | 16          | 3.6 (2.8-4.7)       | 1.4 (1.1-1.8)                  | <b>1.2 (1.0<sup>#</sup>-1.5)</b> | 0.02                        |

\*Adjusted for survey design (clustering and household selection probability within PSU) and standardized for age and gender

^Multivariable logistic regression model adjusted for survey design (sampling probability by PSU and household)

# Lower 95% CI >1.0, but rounded down to 1.0 when using one decimal place.
